# Supplementary material
Source: publisher site journal article supplement (https://www.dovepress.com/article/286270)
Supplement: Supplementary file 1 [file get_supplementary_file.php]

**Supplementary table 1: Analysis of association between SNPs and leprosya**

| **SNP** | **Phenotype** | **Genotype** | **Allele** | **Allele**  **P-value** | **OR (95% CI)** |
| --- | --- | --- | --- | --- | --- |
| rs10817758 | Case (229) | TT/TC/CC (45/100/84) | T/C (190/268) | 0.44 | 0.90(0.70-1.17) |
|  | Control (233) | TT/TC/CC (39/127/67) | T/C (205/261) |  |  |
| rs142179458 | Case (229) | AA/AG/GG (0/15/214) | A/G (15/443) | 0.04 | 2.60(1.00 -6.75) |
|  | Control (233) | AA/AG/GG (0/6/227) | A/G (6/460) |  |  |
| rs146466242 | Case (229) | AA/AT/TT (0/19/210) | A/T (19/439) | 0.69 | 1.14(0.59- 2.23) |
|  | Control (233) | AA/AT/TT (2/13/218) | A/T (17/449) |  |  |
| rs2058660 | Case (229) | CC/CT/TT  (43/123/63) | C/T (209/249) | 0.46 | 0.91(0.70- 1.17) |
|  | Control (233) | CC/CT/TT  (57/110/66) | C/T (224/242) |  |  |
| rs2221593 | Case (229) | AA/AG/GG (26/70/133) | A/G (122/336) | 0.32 | 1.16(0.86- 1.56) |
|  | Control (233) | AA/AG/GG (24/63/146) | A/G (111/355) |  |  |
| rs2275606 | Case (229) | AA/AG/GG (22/81/126) | A/G (125/333) | 0.03 | 1.18(1.03-1.88) |
|  | Control (233) | AA/AG/GG (9/81/143) | A/G (99/367) |  |  |
| rs3764147 | Case (229) | GG/GA/AA (31/114/84) | G/A (176/282) | 0.22 | 1.18(0.90- 1.55) |
|  | Control (233) | GG/GA/AA (30/101/102) | G/A (161/305) |  |  |
| rs4720118 | Case (229) | CC/CT/TT (107/97/25) | C/T (311/147) | 0.98 | 1.00(0.76- 1.32) |
|  | Control (233) | CC/CT/TT (106/104/23) | C/T (316/150) |  |  |
| rs55894533 | Case (229) | AA/AC/CC  (66/117/46) | A/C (249/209) | 0.14 | 0.82(0.63-1.06) |
|  | Control (233) | AA/AC/CC  (80/116/37) | A/C (276/190) |  |  |
| rs6478108 | Case (229) | CC/CT/TT (83/111/35) | C/T (277/181) | 0.08 | 1.27(0.98- 1.65) |
| rs6478108 | Control (233) | CC/CT/TT (71/113/49) | C/T (255/211) |  |  |
| **SNP** | **Phenotype** | **Genotype** | **Allele** | **Allele**  **P-value** | **OR (95% CI)** |
| rs663743 | Case (229) | AA/AG/GG (10/82/137) | A/G (102/356) | 0.002 | 1.71(1.22- 2.40) |
|  | Control (233) | AA/AG/GG (4/59/170) | A/G (67/399) |  |  |
| rs73058713 | Case (229) | AA/AC/CC  (5/69/155) | A/C (79/379) | 0.004 | 1.73(1.19- 2.54) |
|  | Control (233) | AA/AC/CC  (2/46/185) | A/C (50/416) |  |  |
| rs76418789 | Case (229) | AA/AG/GG (1/31/197) | A/G (33/425) | 0.08 | 1.65(0.94- 2.89) |
|  | Control (233) | AA/AG/GG (1/19/213) | A/G (21/445) |  |  |
| rs780668 | Case (229) | GG/GA/AA (68/96/65) | G/A (232/226) | 0.07 | 0.79(0.61- 1.02) |
|  | Control (233) | GG/GA/AA (78/108/47) | G/A (264/202) |  |  |
| rs9302752 | Case (229) | TT/TC/CC (117/94/18) | T/C (328/130) | 0.20 | 0.83(0.62- 1.11) |
|  | Control (233) | TT/TC/CC (135/81/17) | T/C (351/115) |  |  |

a Association tested with χ2 test or Fisher test. OR, odds ratio. CI, confidence interval. SNP, single nucleotide polymorphism.

**Supplementary Table 2: SNPs in studied genes associated with leprosy**

| *Gene* | SNP |
| --- | --- |
| *LACC1* | rs105075221 |
| *TNFSF15* | rs45749211, rs101144701 |
| *NOD2* | rs71948861.  rs80573411,2. rs31354991.  rs124487972  rs22871953  rs80443543  rs14771763 |
| *IL23R* | rs5394973664  rs1995424334  rs2017524194 |

SNP, single nucleotide polymorphism.

**References:**

**1.** Zhang FR, Huang W, Chen SM, et al. Genomewide association study of leprosy. *N Engl J Med.* 2009;361(27):2609-2618.

**2.** Sales-Marques C, Salomão H, Fava VM, et al. NOD2 and CCDC122-LACC1 genes are associated with leprosy susceptibility in Brazilians. *Hum Genet.* 2014;133(12):1525-1532.

**3.** Berrington WR, Macdonald M, Khadge S, et al. Common polymorphisms in the NOD2 gene region are associated with leprosy and its reactive states. *J Infect Dis.* 2010;201(9):1422-1435.

**4.** Li GD, Wang D, Zhang DF, et al. Fine mapping of the GWAS loci identifies SLC35D1 and IL23R as potential risk genes for leprosy. *J Dermatol Sci.* 2016;84(3):322-329.
